# Supplementary material
Source: PubMed Central journal article supplement (PMC3740885)
Supplement: 1303872110_pnas.201303872SI.pdf [file 1303872110_pnas.201303872SI.pdf]

# Supporting Information

Rolland et al. 10.1073/pnas.1303872110

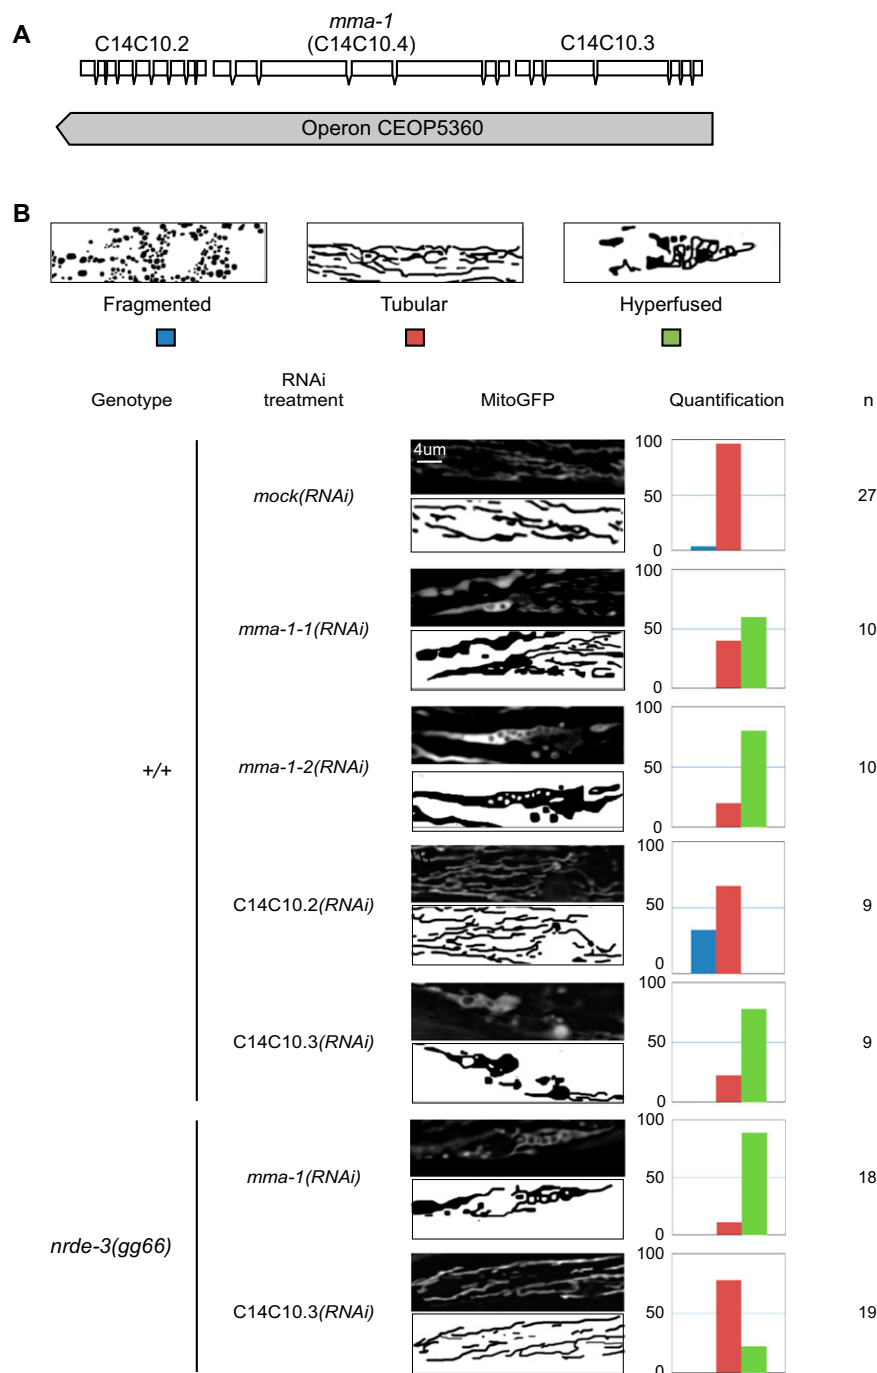

**Fig. S1.** Mitochondrial morphology abnormal-1(RNAi) [*mma-1(RNAi)*] causes mitochondrial hyperfusion. (A) The CEOP5360 operon, containing C14C10.2, *mma-1*, and C14C10.3 is indicated. (B) MD3011 [*bcls78 (Pmyo-3::mitoGFP)*] or MD3098 [*bcls78(Pmyo-3::mitoGFP);nrde-3(gg66)*] L4 larvae were treated with *mma-1-1(RNAi)*, *mma-1-2(RNAi)*, C14C10.2(RNAi), or C14C10.3(RNAi) and mitochondrial morphology in body-wall muscle cells of L4 larvae of the F1 generation was analyzed by fluorescent microscopy [*mma-1-1(RNAi)* and *mma-1-2(RNAi)* are two RNAi constructs directed against the 5' and 3' of the *mma-1* ORF, respectively]. MitoGFP images and schematic of the representative mitochondrial morphology observed in each condition are shown. The frequencies of the different categories of mitochondrial morphology observed as well as the number of animals analyzed are indicated (n).

**A**

Broodsize

mock(RNAi) + - + -

mma-1(RNAi) - + - +

+/+ fzo-1(tm1133)

\* indicates significant difference (p < 0.05) between the +/+ and fzo-1(tm1133) groups for the mma-1(RNAi) + condition.

| Genotype      | mock(RNAi) | mma-1(RNAi) | Broodsize (approx.) |
|---------------|------------|-------------|---------------------|
| +/+           | +          | -           | 350                 |
|               | -          | +           | 330                 |
| fzo-1(tm1133) | +          | -           | 150                 |
|               | -          | +           | 90                  |

**B**

Relative locomotion

mock(RNAi) + -

mma-1(RNAi) - +

| Genotype      | mock(RNAi) | mma-1(RNAi) | Relative locomotion (approx.) |
|---------------|------------|-------------|-------------------------------|
| +/+           | +          | -           | 1.0                           |
|               | -          | +           | 1.0                           |
| fzo-1(tm1133) | +          | -           | 1.2                           |
|               | -          | +           | 1.2                           |







**Table S2. RNAi strains used for RNAi by feeding**

| RNAi strains          | Description                                                                                                                                    |
|-----------------------|------------------------------------------------------------------------------------------------------------------------------------------------|
| <i>mma-1(RNAi)</i>    | <i>mma-1 (RNAi)</i> strain from Ahringer library (1)                                                                                           |
| <i>mma-1-1(RNAi)</i>  | <i>mma-1</i> fragment (nt297-503) from <i>mma-1</i> cDNA cloned into NcoI site of pPD129.36                                                    |
| <i>mma-1-2(RNAi)</i>  | <i>mma-1</i> fragment (nt2652-2874) from <i>mma-1</i> cDNA cloned into NcoI site of pPD129.36                                                  |
| <i>fzo-1(RNAi)</i>    | <i>fzo-1(RNAi)</i> strain from Ahringer library                                                                                                |
| <i>drp-1(RNAi)</i>    | <i>drp-1(RNAi)</i> strain from Ahringer library                                                                                                |
| <i>C14C10.2(RNAi)</i> | <i>C14C10.2(RNAi)</i> strain from Ahringer library                                                                                             |
| <i>C14C10.3(RNAi)</i> | <i>C14C10.3(RNAi)</i> strain from Ahringer library                                                                                             |
| <i>gfm-1(RNAi)</i>    | <i>gfm-1(RNAi)</i> strain from Ahringer library. <i>Caenorhabditis elegans</i> ortholog of mitochondrial translation elongation factor G1 EFG1 |
| <i>nuaf-1(RNAi)</i>   | <i>nuaf-1(RNAi)</i> strain from Ahringer library. <i>C. elegans</i> ortholog of the complex I assembly factor NDUAF1                           |
| <i>sco-1(RNAi)</i>    | <i>sco-1(RNAi)</i> strain from Ahringer library. <i>C. elegans</i> ortholog of the complex IV assembly factor SCO1                             |

1. Kamath RS, Ahringer J (2003) Genome-wide RNAi screening in *Caenorhabditis elegans*. *Methods* 30(4):313–321.

**Table S3. Plasmids used to generate dsRNA for RNAi by injection**

| Plasmid | Insert                            | Target                                                                                  |
|---------|-----------------------------------|-----------------------------------------------------------------------------------------|
| pBC1088 | <i>mma-1</i> fragment (nt297-503) | <i>mma-1</i>                                                                            |
| pBC1181 | <i>tfbm-1</i> entire cDNA         | <i>C. elegans</i> ortholog of the mitochondrial transcription factor TFB1M              |
| pBC1188 | <i>hmg-5</i> exon 2               | <i>C. elegans</i> ortholog of the mitochondrial transcription factor TFAM               |
| pBC1208 | <i>rpom-1</i> exon 3              | <i>C. elegans</i> ortholog of the mitochondrial RNA polymerase POLMRT                   |
| pBC1209 | <i>gfm-1</i> exon 3               | <i>C. elegans</i> ortholog of the mitochondrial translation elongation factor G1, EFG1. |
| pBC1213 | <i>nuaf-1</i> exon 5              | <i>C. elegans</i> ortholog of the complex I assembly factor, NDUAF1.                    |
| pBC1214 | <i>sco-1</i> exon 2               | <i>C. elegans</i> ortholog of the complex IV assembly factor, SCO1.                     |
| pBC1210 | <i>sft-1</i> exon 2               | <i>C. elegans</i> ortholog of the complex IV assembly factor, SURF1.                    |
| pBC1211 | <i>cox-10</i> exon 7              | <i>C. elegans</i> ortholog of the complex IV assembly factor, COX10.                    |
| pBC1212 | <i>cox-15</i> exon 3              | <i>C. elegans</i> ortholog of the complex IV assembly factor, COX15.                    |

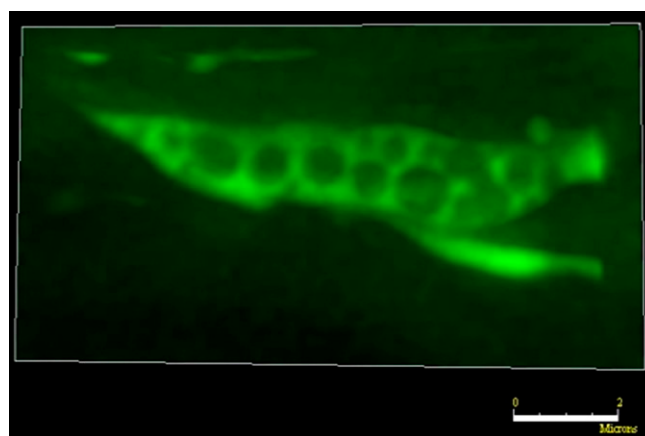

**Movie S1.** *mma-1(RNAi)* causes mitochondrial hyperfusion (related to Fig. 1). A z stack taken on an epifluorescent microscope of a representative muscle cell of MD3011 animal treated with *mma-1(RNAi)* was used to generate a 3D reconstruction using AutoDeblur/AutoVisualize software. The video represents a  $\pm 45^\circ$  rotation of the 3D reconstruction. mitoGFP-labeled mitochondria are shown in green.

[Movie S1](#)
